# Supplementary material for: Comparative cost-effectiveness of SARS-CoV-2 vaccine dose fractionation in India: a modelling study
Source: Research Square preprint supplement (doi:10.21203/rs.3.rs-855843/v1), 2021-09-01
Supplement: Supplementary file 1 [file dce04ce27f05343bcdc81f73.docx]

# Supplement

# Comparative cost-effectiveness of SARS-CoV-2 vaccine dose fractionation in India: a modelling study

Zhanwei Du1,2, Lin Wang3, Abhishek Pandey4, Wey Wen Lim1, Matteo Chinazzi5, Ana Pastore y Piontti5, Eric H. Y. Lau1,2, Peng Wu1,2, Anup Malani6, Sarah Cobey7, Benjamin J. Cowling1,2*

**Affiliations:**

1 WHO Collaborating Centre for Infectious Disease Epidemiology and Control, School of Public Health, Li Ka Shing Faculty of Medicine, The University of Hong Kong, Hong Kong Special Administrative Region, China.

2 Laboratory of Data Discovery for Health, Hong Kong Science and Technology Park, Hong Kong Special Administrative Region, China

3 Department of Genetics, University of Cambridge, Cambridge, CB2 3EH, UK

4 Center for Infectious Disease Modeling and Analysis, Yale School of Public Health, New Haven, CT 06510, USA

5 Laboratory for the Modeling of Biological and Socio-technical Systems, Northeastern University, Boston, MA, USA

6 Law School, University of Chicago, Chicago, Illinois, USA

7 Department of Ecology and Evolutionary Biology, University of Chicago, Chicago, Illinois, USA

Corresponding author: Benjamin J. Cowling

* **Correspond to:** bcowling@hku.hk

**
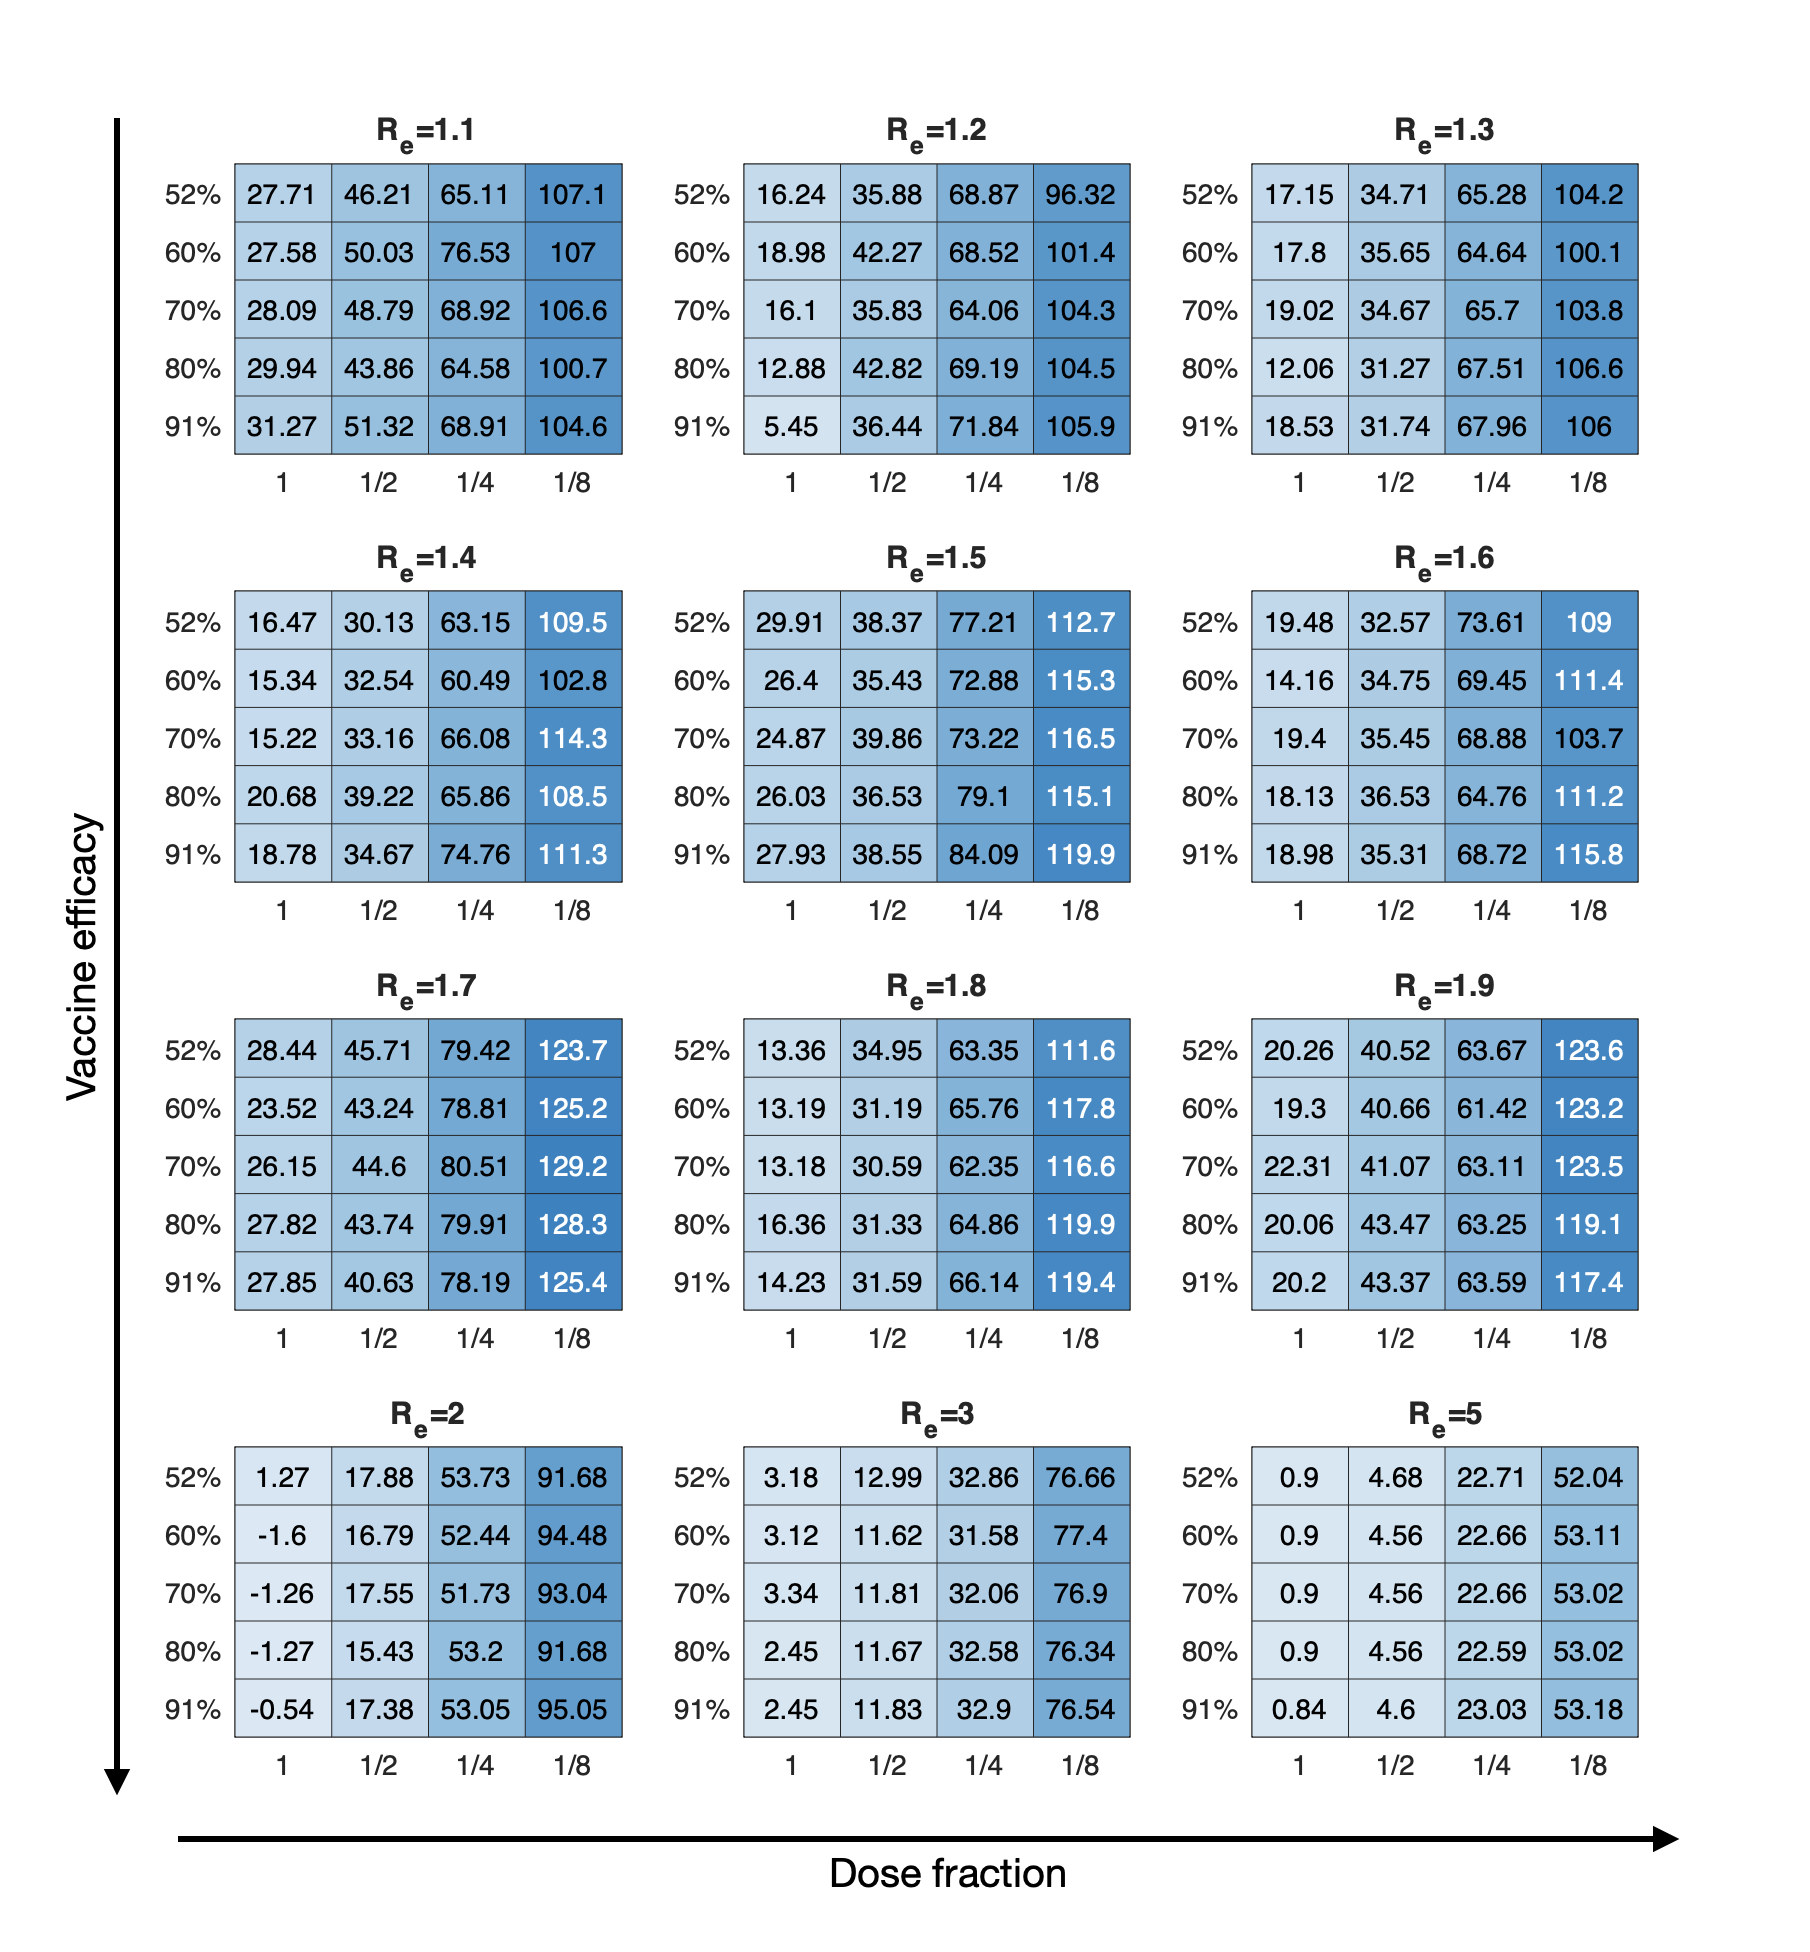
**

[**Figure S1**](#sifig_optimal12)**. Projected net monetary benefit averted ($ billion) in the India individual network with proportions of vaccine efficacy and dose fractionation.** Assuming a vaccine cost of US$12 and WTP per YLL averted of US$10,517, these projections are mean estimates of net monetary benefit (NMB) based on 100 stochastic simulations of COVID-19 transmission over vaccine efficacy of transmission from 52% to 91% over 12 synthetic scenarios of transmission, under parameters given in the appendix ([**Table S3**](#sta_paras)). The optimal strategy under various transmission scenarios would always be doses of vaccines with more fractionations over vaccine efficacy of transmission.


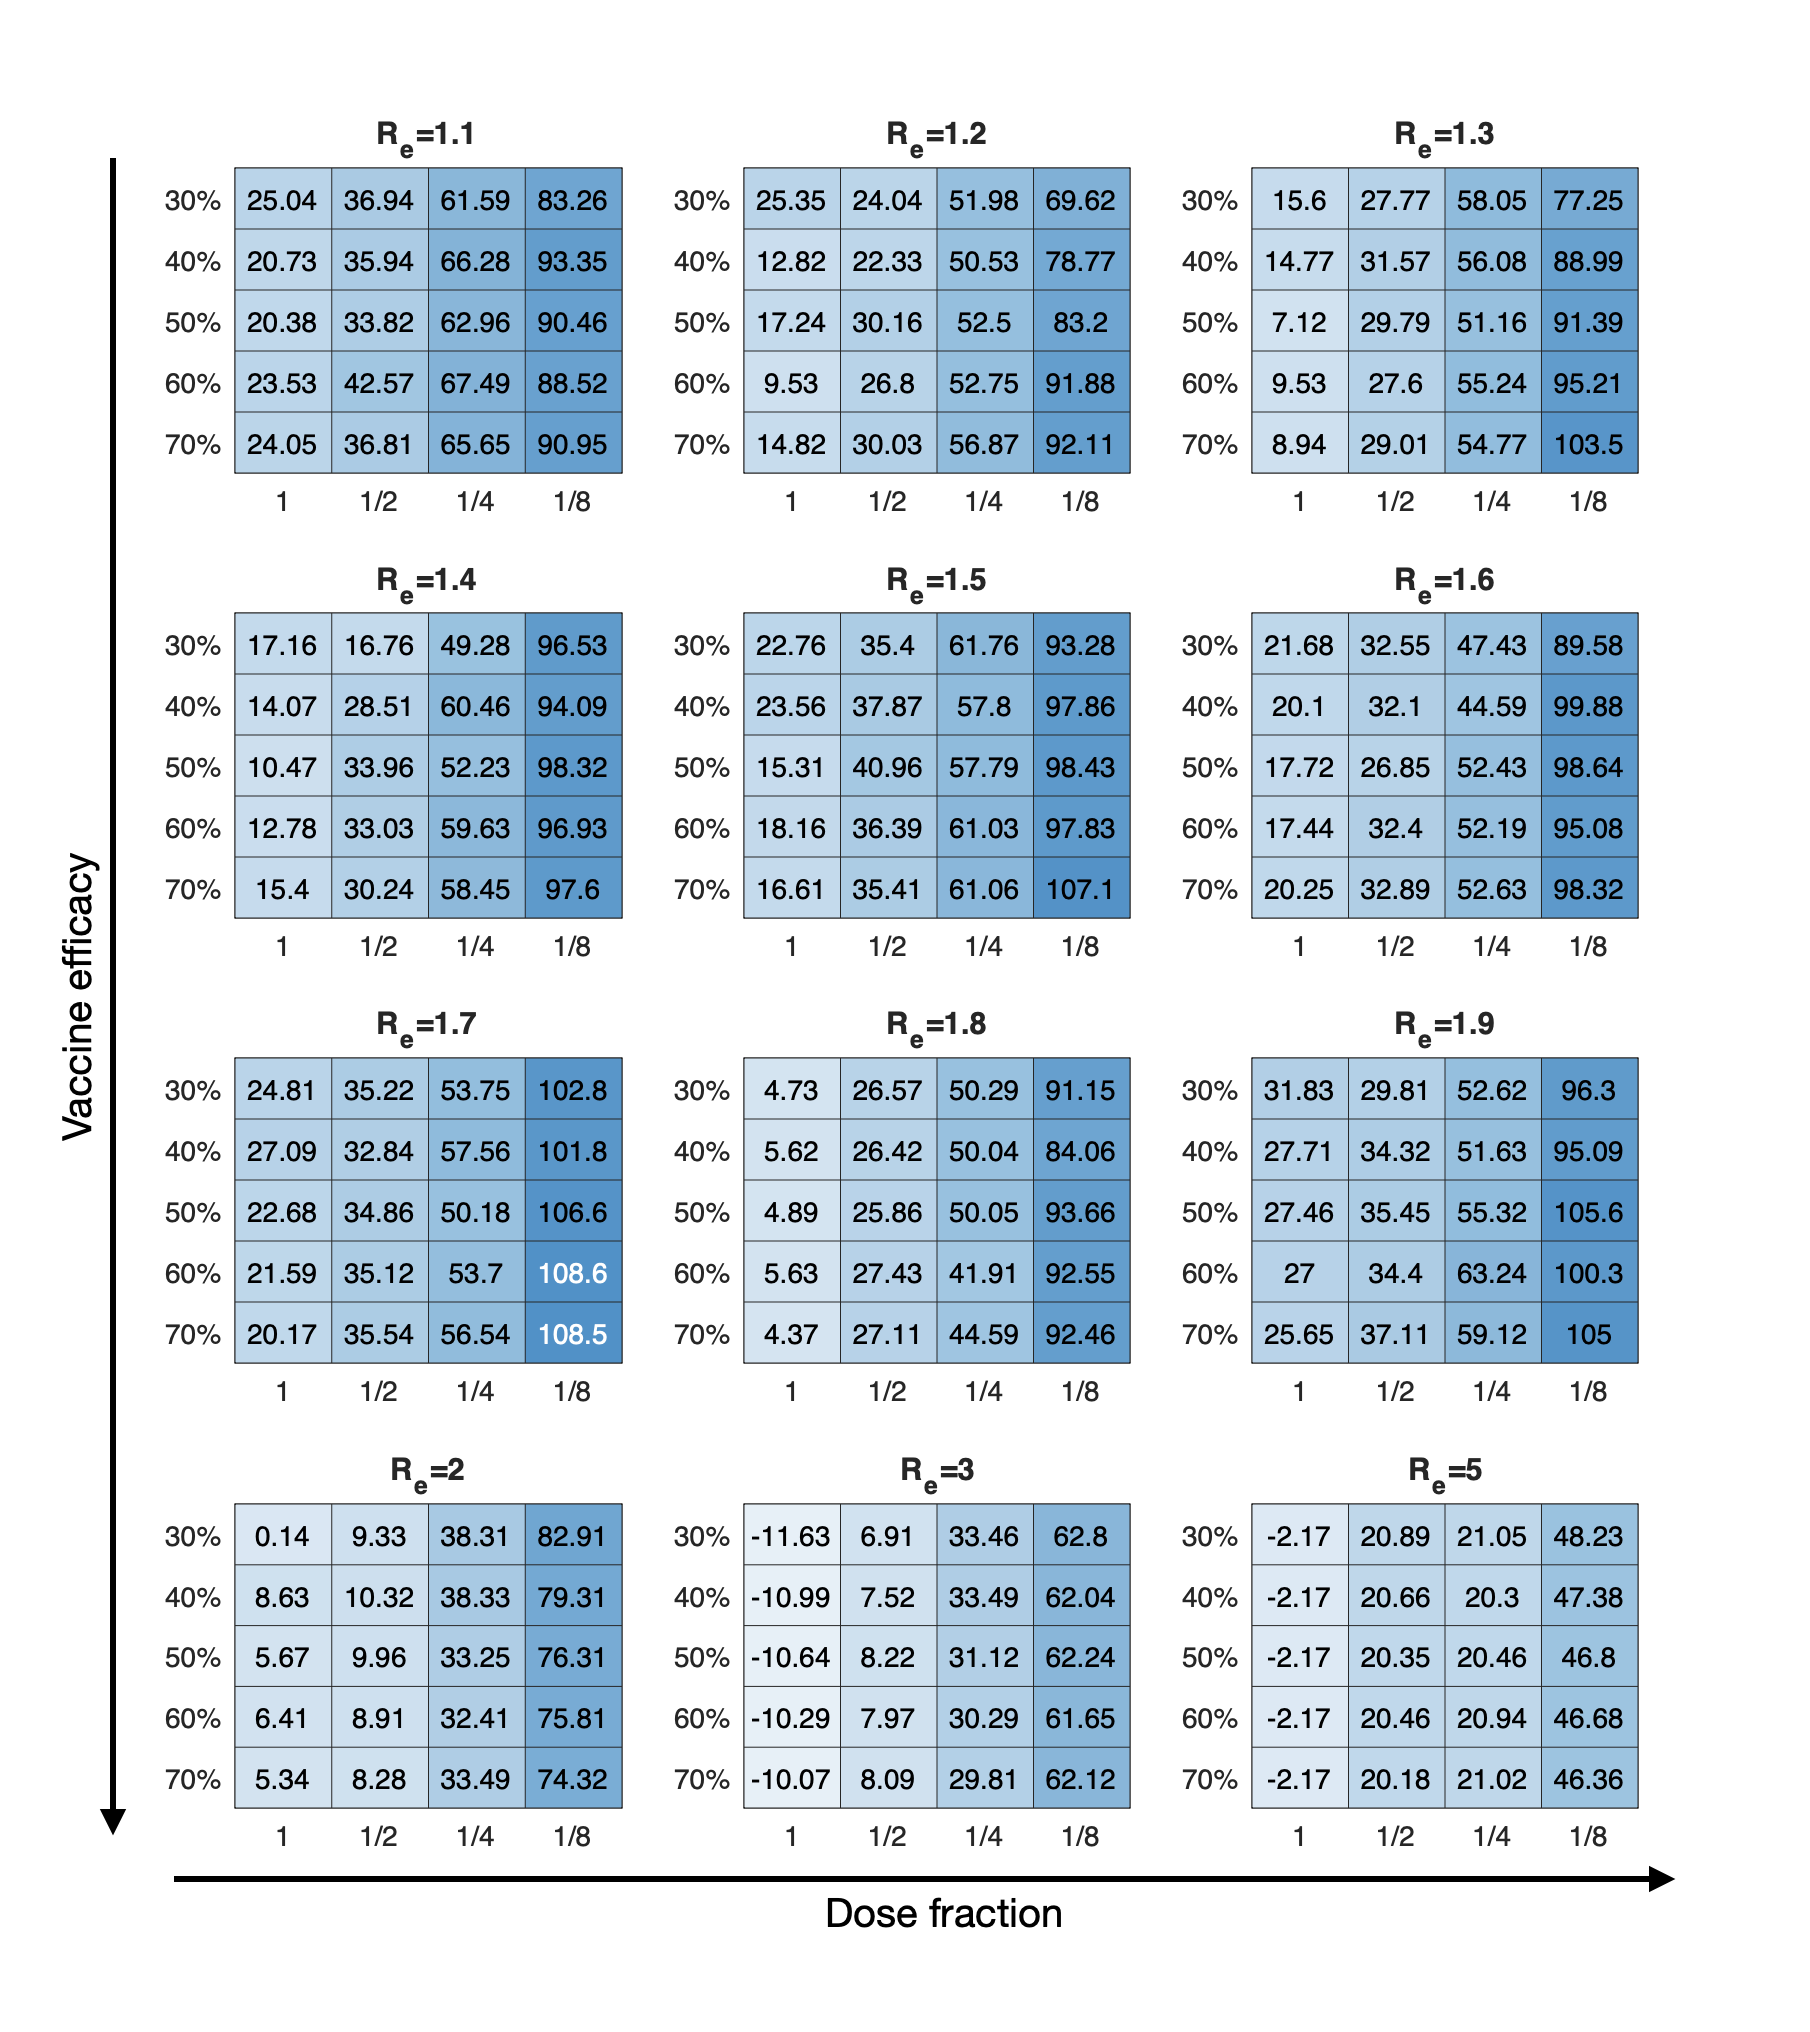


[**Figure S2**](#sifig_optimal12_half)**. Projected net monetary benefit averted ($ billion) in the India individual network with reduced proportions of vaccine efficacy and dose fractionation.** Assuming a vaccine cost of US$12 and WTP per YLL averted of US$10,517, these projections are mean estimates of net monetary benefit (NMB) based on 100 stochastic simulations of COVID-19 transmission over vaccine efficacy of transmission from 30% to 70% over 12 synthetic scenarios of transmission, under parameters given in the appendix ([**Table S4**](#sta_paras_sentivity)). The optimal strategy under various transmission scenarios would always be doses of vaccines with more fractionations over vaccine efficacy of transmission.

[**Table S1**](#stabl_Re)**. The optimal choice is for 1/4 fractionated dose with 91% vaccine efficacy of transmission, across a range of SARS-CoV-2 transmission, assuming $12 per vaccine in India.** We estimate the median (95% CrI) of incremental costs, YLL and net monetary benefits, in contrast with status quo, which are all reported and scaled to an India population of 1366 million.

| ***Re*** | **Median incremental costs (95% CrI) in billion** | **Median incremental YLL averted (95% CrI) in million** | **Median incremental net monetary benefits (95% CrI) in billion** |
| --- | --- | --- | --- |
| 1.1 | 0.4 (95% CrI:-0.84, 1.48) | 10.54 (95% CrI:0.26, 19.06) | 106.61 (95% CrI:1.99, 193.18) |
| 1.2 | 0.56 (95% CrI:-0.91, 1.83) | 10.32 (95% CrI:-3.8, 21.72) | 104.26 (95% CrI:-40.31, 219.77) |
| 1.3 | 0.56 (95% CrI:-0.58, 1.62) | 10.27 (95% CrI:-1.39, 24.26) | 103.77 (95% CrI:-15.21, 246.86) |
| 1.4 | 0.48 (95% CrI:-0.81, 1.71) | 11.3 (95% CrI:1.15, 22.72) | 114.34 (95% CrI:10.02, 230.52) |
| 1.5 | 0.46 (95% CrI:-0.72, 1.6) | 11.51 (95% CrI:-3.61, 23.53) | 116.45 (95% CrI:-38.18, 239.04) |
| 1.6 | 0.6 (95% CrI:-0.91, 2.12) | 10.27 (95% CrI:-2.78, 22.97) | 103.69 (95% CrI:-29.47, 233.58) |
| 1.7 | 0.43 (95% CrI:-0.95, 1.76) | 12.76 (95% CrI:0.86, 24.07) | 129.21 (95% CrI:8.26, 244.36) |
| 1.8 | 0.54 (95% CrI:-0.72, 1.71) | 11.54 (95% CrI:-0.32, 24.82) | 116.63 (95% CrI:-4.85, 251.89) |
| 1.9 | 0.65 (95% CrI:-0.57, 1.97) | 12.22 (95% CrI:-2.22, 24.39) | 123.47 (95% CrI:-23.84, 246.91) |
| 2 | 0.67 (95% CrI:-0.64, 1.93) | 9.23 (95% CrI:-4.93, 22.26) | 93.04 (95% CrI:-50.58, 225.69) |
| 3 | 1.31 (95% CrI:-0.5, 2.99) | 7.7 (95% CrI:-7.19, 23.02) | 76.9 (95% CrI:-76.99, 233.54) |
| 5 | 1.75 (95% CrI:0.53, 3.15) | 5.39 (95% CrI:-9.7, 22.08) | 53.02 (95% CrI:-101.06, 222.57) |

[**Table S2**](#stabl_Re_3)**. The optimal choice is for 1/4 fractionated dose with 91% vaccine efficacy of transmission, across a range of SARS-CoV-2 transmission, assuming $3 per vaccine in India** [1](https://paperpile.com/c/H2bMpt/aTNk1)**.** We estimate the median (95% CrI) of incremental costs, YLL and net monetary benefits, in contrast with status quo, which are all reported and scaled to an India population of 1366 million.

| ***Re*** | **Median incremental costs (95% CrI) in billion** | **Median incremental YLL averted (95% CrI) in million** | **Median incremental net monetary benefits (95% CrI) in billion** |
| --- | --- | --- | --- |
| 1.1 | -1.75 (95% CrI:-2.99, -0.67) | 10.54 (95% CrI:0.26, 19.06) | 108.76 (95% CrI:4.14, 195.33) |
| 1.2 | -1.59 (95% CrI:-3.06, -0.32) | 10.32 (95% CrI:-3.8, 21.72) | 106.41 (95% CrI:-38.16, 221.93) |
| 1.3 | -1.59 (95% CrI:-2.73, -0.53) | 10.27 (95% CrI:-1.39, 24.26) | 105.92 (95% CrI:-13.06, 249.01) |
| 1.4 | -1.67 (95% CrI:-2.96, -0.44) | 11.3 (95% CrI:1.15, 22.72) | 116.49 (95% CrI:12.17, 232.67) |
| 1.5 | -1.69 (95% CrI:-2.87, -0.55) | 11.51 (95% CrI:-3.61, 23.53) | 118.6 (95% CrI:-36.03, 241.2) |
| 1.6 | -1.55 (95% CrI:-3.06, -0.03) | 10.27 (95% CrI:-2.78, 22.97) | 105.84 (95% CrI:-27.32, 235.73) |
| 1.7 | -1.72 (95% CrI:-3.1, -0.39) | 12.76 (95% CrI:0.86, 24.07) | 131.37 (95% CrI:10.41, 246.51) |
| 1.8 | -1.61 (95% CrI:-2.87, -0.44) | 11.54 (95% CrI:-0.32, 24.82) | 118.78 (95% CrI:-2.7, 254.05) |
| 1.9 | -1.5 (95% CrI:-2.72, -0.18) | 12.22 (95% CrI:-2.22, 24.39) | 125.62 (95% CrI:-21.69, 249.07) |
| 2 | -1.48 (95% CrI:-2.79, -0.22) | 9.23 (95% CrI:-4.93, 22.26) | 95.19 (95% CrI:-48.42, 227.84) |
| 3 | -0.84 (95% CrI:-2.65, 0.84) | 7.7 (95% CrI:-7.19, 23.02) | 79.05 (95% CrI:-74.83, 235.69) |
| 5 | -0.4 (95% CrI:-1.62, 0.99) | 5.39 (95% CrI:-9.7, 22.08) | 55.17 (95% CrI:-98.91, 224.73) |

##### [**Table S3**](#stabl_paras)**. Vaccine efficacy parameters for the individual-based SARS-CoV-2 infection dynamic model.**

| **Parameters** | **Values** |
| --- | --- |
| [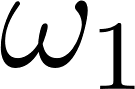](https://www.codecogs.com/eqnedit.php?latex=%5Comega_1#0): infection-blocking vaccine efficacy (%) after the first dose to before the second dose | 52% |
| [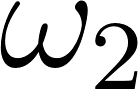](https://www.codecogs.com/eqnedit.php?latex=%5Comega_2#0): infection-blocking vaccine efficacy (%) after the second dose | Assumed to be 52%, 60%, 70%, 80%, and 91% for different settings of dosing, respectively |
| [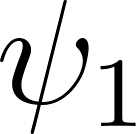](https://www.codecogs.com/eqnedit.php?latex=%5Cpsi_1#0): symptom-blocking vaccine efficacy (%) after the first dose to before the second dose | Assumed to be 88% with respect to the relationship between infection efficacy and symptom efficacy [2](https://paperpile.com/c/H2bMpt/f9mkO) |
| [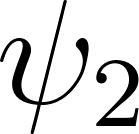](https://www.codecogs.com/eqnedit.php?latex=%5Cpsi_2#0): symptom-blocking vaccine efficacy (%) after the second dose | Assumed to be 88%, 92%, 95%, 97%, and 98% for different settings of dosing with respect to the relationship between infection efficacy and symptom efficacy [2](https://paperpile.com/c/H2bMpt/f9mkO) |

#####

##### [**Table S4**](#stabl_paras_sentivity)**. Sensitivity analysis of vaccine efficacy parameters for the individual-based SARS-CoV-2 infection dynamic model.**

| **Parameters** | **Values** |
| --- | --- |
| [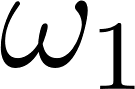](https://www.codecogs.com/eqnedit.php?latex=%5Comega_1#0): infection-blocking vaccine efficacy (%) after the first dose to before the second dose | 30% |
| [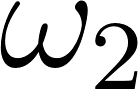](https://www.codecogs.com/eqnedit.php?latex=%5Comega_2#0): infection-blocking vaccine efficacy (%) after the second dose | Assumed to be 30%, 40%, 50%, 60%, and 70% for different settings of dosing, respectively |
| [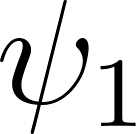](https://www.codecogs.com/eqnedit.php?latex=%5Cpsi_1#0): symptom-blocking vaccine efficacy (%) after the first dose to before the second dose | Assumed to be 73% with respect to the relationship between infection efficacy and symptom efficacy [2](https://paperpile.com/c/H2bMpt/f9mkO) |
| [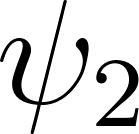](https://www.codecogs.com/eqnedit.php?latex=%5Cpsi_2#0): symptom-blocking vaccine efficacy (%) after the second dose | Assumed to be 73%, 82%, 88%, 92%, and 95% for different settings of dosing with respect to the relationship between infection efficacy and symptom efficacy [2](https://paperpile.com/c/H2bMpt/f9mkO) |

##### [**Table S5**](#stabl_ParaTransmission)**. Epidemiological parameters for the individual-based SARS-CoV-2 infection dynamic model.** We model multiple strategies for expanding vaccination combined with a fixed baseline level with no vaccination (i.e., *status quo*).

| **Parameters** | **Values** |
| --- | --- |
| *N*: population of individuals | 47,568 |
| [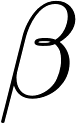](https://www.codecogs.com/eqnedit.php?latex=%20%5Cbeta#0): transmission rate | Calibrated to *Re* |
| Initial number of infections (in exposed state) | 10 |
| [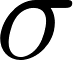](https://www.codecogs.com/eqnedit.php?latex=%5Csigma#0): transition rate out of exposed state | 1/3 [3](https://paperpile.com/c/H2bMpt/lfHMI) |
| [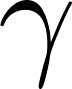](https://www.codecogs.com/eqnedit.php?latex=%5Cgamma#0): recovery rate of symptomatic individuals | 1/4 [4,5](https://paperpile.com/c/H2bMpt/gBOrL+ELqJG) |
| [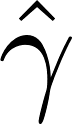](https://www.codecogs.com/eqnedit.php?latex=%5Chat%7B%5Cgamma%7D#0): recovery rate of asymptomatic individuals | 1/9 [6](https://paperpile.com/c/H2bMpt/x3Rcw) |
| [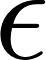](https://www.codecogs.com/eqnedit.php?latex=%5Cepsilon#0): transition rate from the pre-symptomatic to symptomatic stage | 1/2 [3](https://paperpile.com/c/H2bMpt/lfHMI) |
| [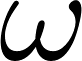](https://www.codecogs.com/eqnedit.php?latex=%5Comega#0): relative infectiousness of pre-symptomatic cases | 1.57 [4,5](https://paperpile.com/c/H2bMpt/ELqJG+gBOrL) |
| [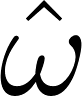](https://www.codecogs.com/eqnedit.php?latex=%5Chat%7B%5Comega%7D#0): relative infectiousness of asymptomatic cases | 0.5 [7](https://paperpile.com/c/H2bMpt/W4jPf) |
| [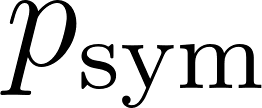](https://www.codecogs.com/eqnedit.php?latex=p_%7B%5Ctext%7Bsym%7D%7D#0): proportion of infections that are symptomatic | 75% [5,8](https://paperpile.com/c/H2bMpt/NzhAs+ELqJG) |
| : recovery rate in hospitalized compartment | 0.143 [9](https://paperpile.com/c/H2bMpt/SQ9AO) |
| [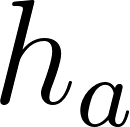](https://www.codecogs.com/eqnedit.php?latex=h_a#0): age-specific proportion of symptomatic cases that are hospitalized | [0%, 0.025%, 2.672%, 9.334%, 15.465%]  for [0-4y, 5-17y, 18-49y, 50-64y, >65y] [10](https://paperpile.com/c/H2bMpt/uV1Ag) |
| η: transition rate from symptomatic to hospitalized | 1/5.9 [11](https://paperpile.com/c/H2bMpt/Ze0TZ) |
| [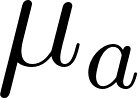](https://www.codecogs.com/eqnedit.php?latex=%5Cmu_a#0): age-specific mortality rate for hospitalized cases | [3.9%, 12.1%, 3.0%, 10.5%, 22.7%]  for [0-4y, 5-17y, 18-49y, 50-64y, >65y] [10,12](https://paperpile.com/c/H2bMpt/f3uWQ+uV1Ag) |
| [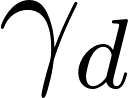](https://www.codecogs.com/eqnedit.php?latex=%5Cgamma_d#0): transition rate from hospitalized to deceased for cases that succumb | 0.128 [12](https://paperpile.com/c/H2bMpt/f3uWQ) |
| [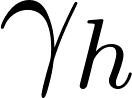](https://www.codecogs.com/eqnedit.php?latex=%5Cgamma_h#0): transition rate from hospitalized to recovered for cases discharged alive | 0.091 [12](https://paperpile.com/c/H2bMpt/f3uWQ) |
| [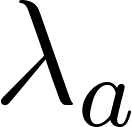](https://www.codecogs.com/eqnedit.php?latex=%5Clambda_a#0): life expectancy (years) for age group [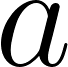](https://www.codecogs.com/eqnedit.php?latex=a#0), adjusted assuming a 3% yearly discount rate | [29.4, 28.1, 23.2, 16.3, 10.2] for [0-4y, 5-17y, 18-49y, 50-64y, >65y] [13](https://paperpile.com/c/H2bMpt/fonmH) |
| ***Vaccination* parameters** | |
| [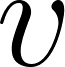](https://www.codecogs.com/eqnedit.php?latex=v#0): daily available vaccination number assuming an India population of 1366 million and a daily vaccination rate of first dose starting from 0.01% on January 16, 2021 with the total of 12.5% population during the 150 days [14](https://paperpile.com/c/H2bMpt/Kejwg) | Assumed |
| [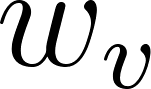](https://www.codecogs.com/eqnedit.php?latex=w_v#0): number of weeks for vaccination assignment | 20 [15](https://paperpile.com/c/H2bMpt/hqEJu) |
| [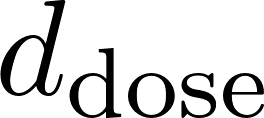](https://www.codecogs.com/eqnedit.php?latex=d_%5Ctext%7Bdose%7D#0): days between first dose and second dose | 28 [16](https://paperpile.com/c/H2bMpt/KVcQB) |
| [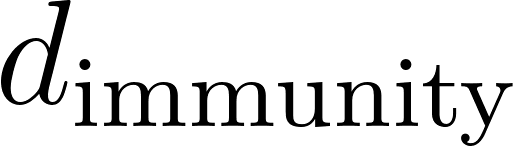:](https://www.codecogs.com/eqnedit.php?latex=d_%5Ctext%7Bimmunity%7D#0) days acquiring immunity after the first or second dose | 14 [17,18](https://paperpile.com/c/H2bMpt/CjIQq+WemJy) |
| [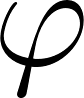](https://www.codecogs.com/eqnedit.php?latex=%5Cvarphi#0): vaccine adherence rate | 0.7 [19](https://paperpile.com/c/H2bMpt/QOnyb) |
| ***Status quo* parameters** | |
| [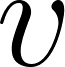](https://www.codecogs.com/eqnedit.php?latex=v#0): daily available vaccination number assuming an India population of 1366 million and a daily vaccination rate of 0% | 0 |

##### [**Table S6**](#stabl_Cost)**. Cost parameters**

| **Parameter** | **Value (USD)** |
| --- | --- |
| Cost of administering two doses of vaccination ([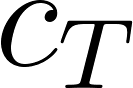](https://www.codecogs.com/eqnedit.php?latex=c_T#0)) by taking Covishield vaccine manufactured by the Serum Institute of India as an example | $12 [20](https://paperpile.com/c/H2bMpt/aVcZ9) |
| Median COVID-19 hospitalization cost by age group ([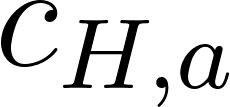](https://www.codecogs.com/eqnedit.php?latex=c_%7BH%2Ca%7D#0)) | $604 [21](https://paperpile.com/c/H2bMpt/w5lUe) for any age group |

**References**.

1. [Andersen, C., Andrews, K., Cain, J. & Tandona, A. South Asia Vaccinates against COVID-19: Health Financing and Health Systems Considerations. (2021).](http://paperpile.com/b/H2bMpt/aTNk1)

2. [Khoury, D. S. *et al.* Neutralizing antibody levels are highly predictive of immune protection from symptomatic SARS-CoV-2 infection. *Nat. Med.* (2021) doi:](http://paperpile.com/b/H2bMpt/f9mkO)[10.1038/s41591-021-01377-8](http://dx.doi.org/10.1038/s41591-021-01377-8)[.](http://paperpile.com/b/H2bMpt/f9mkO)

3. [Backer, J. A., Klinkenberg, D. & Wallinga, J. Incubation period of 2019 novel coronavirus (2019-nCoV) infections among travellers from Wuhan, China, 20-28 January 2020. *Euro Surveill.* **25**, 2000062 (2020).](http://paperpile.com/b/H2bMpt/lfHMI)

4. [He, X. *et al.* Temporal dynamics in viral shedding and transmissibility of COVID-19. *Nat. Med.* **26**, 672–675 (2020).](http://paperpile.com/b/H2bMpt/gBOrL)

5. [Aleta, A. *et al.* Modelling the impact of testing, contact tracing and household quarantine on second waves of COVID-19. *Nat Hum Behav* **4**, 964–971 (2020).](http://paperpile.com/b/H2bMpt/ELqJG)

6. [Du, Z. *et al.* Comparative Cost-Effectiveness of SARS-CoV-2 Testing Strategies. *papers.ssrn.com* (2020) doi:](http://paperpile.com/b/H2bMpt/x3Rcw)[10.2139/ssrn.3714642](http://dx.doi.org/10.2139/ssrn.3714642)[.](http://paperpile.com/b/H2bMpt/x3Rcw)

7. [McEvoy, D. *et al.* Relative infectiousness of asymptomatic SARS-CoV-2 infected persons compared with symptomatic individuals: a rapid scoping review. *BMJ Open* **11**, e042354 (2021).](http://paperpile.com/b/H2bMpt/W4jPf)

8. [Nishiura, H. *et al.* Estimation of the asymptomatic ratio of novel coronavirus infections (COVID-19). *Int. J. Infect. Dis.* **94**, 154–155 (2020).](http://paperpile.com/b/H2bMpt/NzhAs)

9. [Lachmann, M. *et al.* Texas Trauma Service Area (TSA) COVID-19 transmission estimates and healthcare projections: Oct. 20 Update. (2020).](http://paperpile.com/b/H2bMpt/SQ9AO)

10. [Verity, R. *et al.* Estimates of the severity of coronavirus disease 2019: a model-based analysis. *Lancet Infect. Dis.* **20**, 669–677 (2020).](http://paperpile.com/b/H2bMpt/uV1Ag)

11. [Tindale, L. *et al.* Transmission interval estimates suggest pre-symptomatic spread of COVID-19. *Epidemiology* (2020) doi:](http://paperpile.com/b/H2bMpt/Ze0TZ)[10.1101/2020.03.03.20029983](http://dx.doi.org/10.1101/2020.03.03.20029983)[.](http://paperpile.com/b/H2bMpt/Ze0TZ)

12. [Wang, X. *et al.* Impact of Social Distancing Measures on Coronavirus Disease Healthcare Demand, Central Texas, USA. *Emerg. Infect. Dis.* **26**, 2361–2369 (2020).](http://paperpile.com/b/H2bMpt/f3uWQ)

13. [Office of the Registrar General & Census Commissioner, India. SRS Based Abridged Life Tables 2013-17.](http://paperpile.com/b/H2bMpt/fonmH) <https://censusindia.gov.in/Vital_Statistics/SRS_Life_Table/SRS%20based%20Abridged%20Life%20Tables%202013-17.pdf> [(2019).](http://paperpile.com/b/H2bMpt/fonmH)

14. [Ritchie, H. *et al.* Coronavirus Pandemic (COVID-19). *Our World in Data* (2020).](http://paperpile.com/b/H2bMpt/Kejwg)

15. [Biggerstaff, M. Modeling Strategies for the Initial Allocation of SARS-CoV-2 Vaccines.](http://paperpile.com/b/H2bMpt/hqEJu) <https://stacks.cdc.gov/view/cdc/97351>[.](http://paperpile.com/b/H2bMpt/hqEJu)

16. [Jackson, L. A. *et al.* An mRNA Vaccine against SARS-CoV-2 — Preliminary Report. *N. Engl. J. Med.* **383**, 1920–1931 (2020).](http://paperpile.com/b/H2bMpt/KVcQB)

17. [Vaccines and Related Biological Products Advisory Committee December 17, 2020 Meeting Briefing Document Addendum- Sponsor.](http://paperpile.com/b/H2bMpt/CjIQq)

18. [Wang, X. *et al.* Effects of COVID-19 Vaccination Timing and Risk Prioritization on Mortality Rates, United States. *Emerging Infectious Disease journal* **27**, (2021).](http://paperpile.com/b/H2bMpt/WemJy)

19. [U.S. Public Now Divided Over Whether To Get COVID-19 Vaccine.](http://paperpile.com/b/H2bMpt/QOnyb) <https://www.pewresearch.org/science/2020/09/17/u-s-public-now-divided-over-whether-to-get-covid-19-vaccine/> [(2020).](http://paperpile.com/b/H2bMpt/QOnyb)

20. [Nagarajan, R. At Rs 700-Rs 1,500, price of Covid vaccine in India’s private sector among costliest. *Times Of India*](http://paperpile.com/b/H2bMpt/aVcZ9) <https://timesofindia.indiatimes.com/india/at-rs700-rs1500-price-of-covid-vaccine-in-indias-private-sector-among-costliest/articleshow/82509814.cms> [(2021).](http://paperpile.com/b/H2bMpt/aVcZ9)

21. [COVID-19 Treatment Cost in India & COVID Hospitalization Expenses.](http://paperpile.com/b/H2bMpt/w5lUe) <https://www.aegonlife.com/insurance-investment-knowledge/covid-19-treatment-cost-in-india/> [(2020).](http://paperpile.com/b/H2bMpt/w5lUe)
